# Supplementary figures and images for: Expanded human NK cells from lung cancer patients sensitize patients’ PDL1−negative tumors to PD1-blockade therapy
Source: PubMed Central journal article supplement — J Immunother Cancer. 2021 Jan 21;9(1):e001933. doi: 10.1136/jitc-2020-001933 (PMC7825270; doi:10.1136/jitc-2020-001933), 2021-01-21

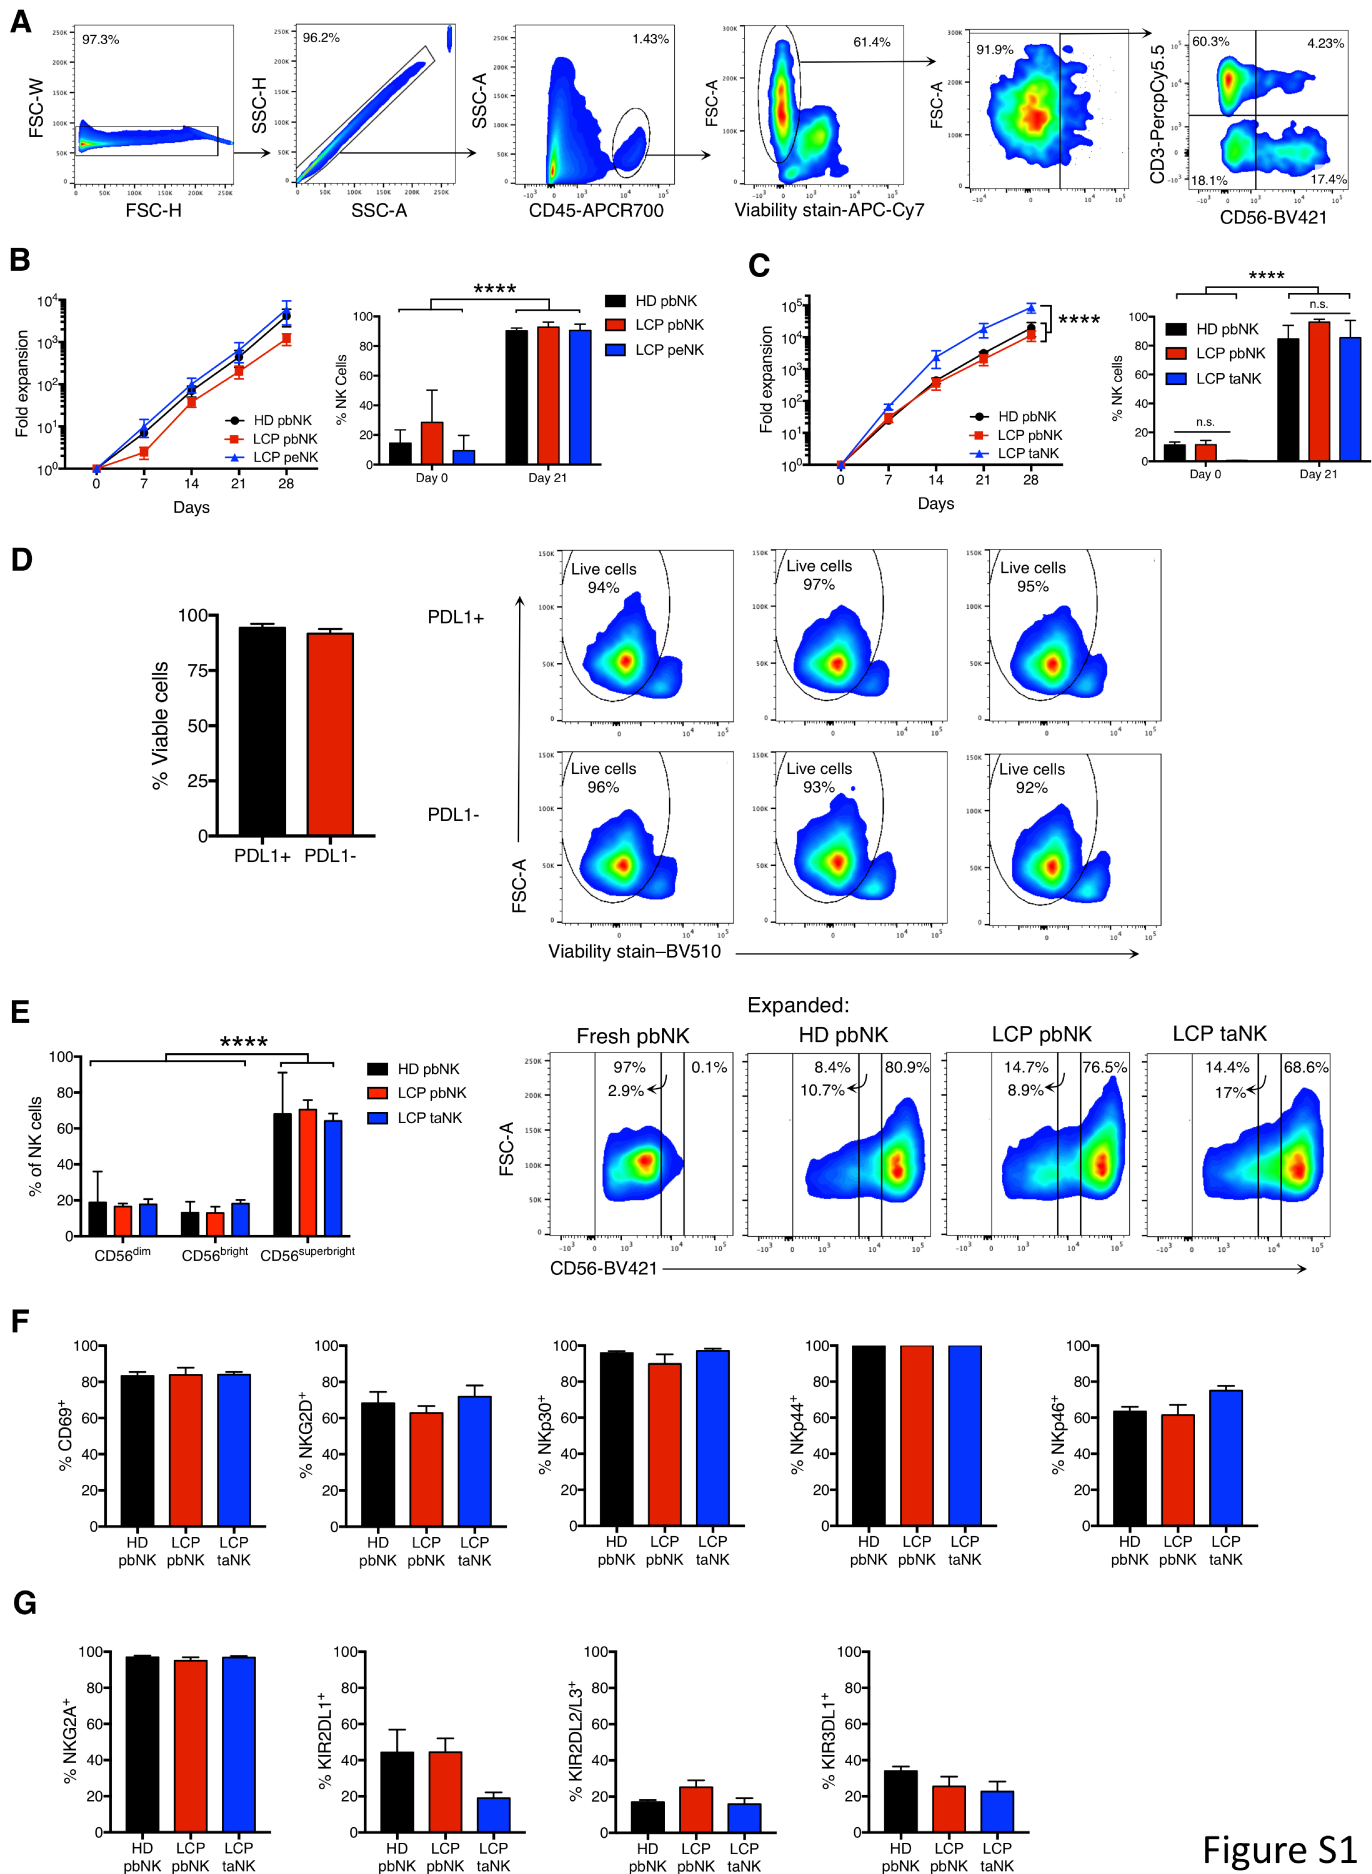

Figure S1

Supplement: jitc-2020-001933supp001.pdf [file jitc-2020-001933supp001.pdf]

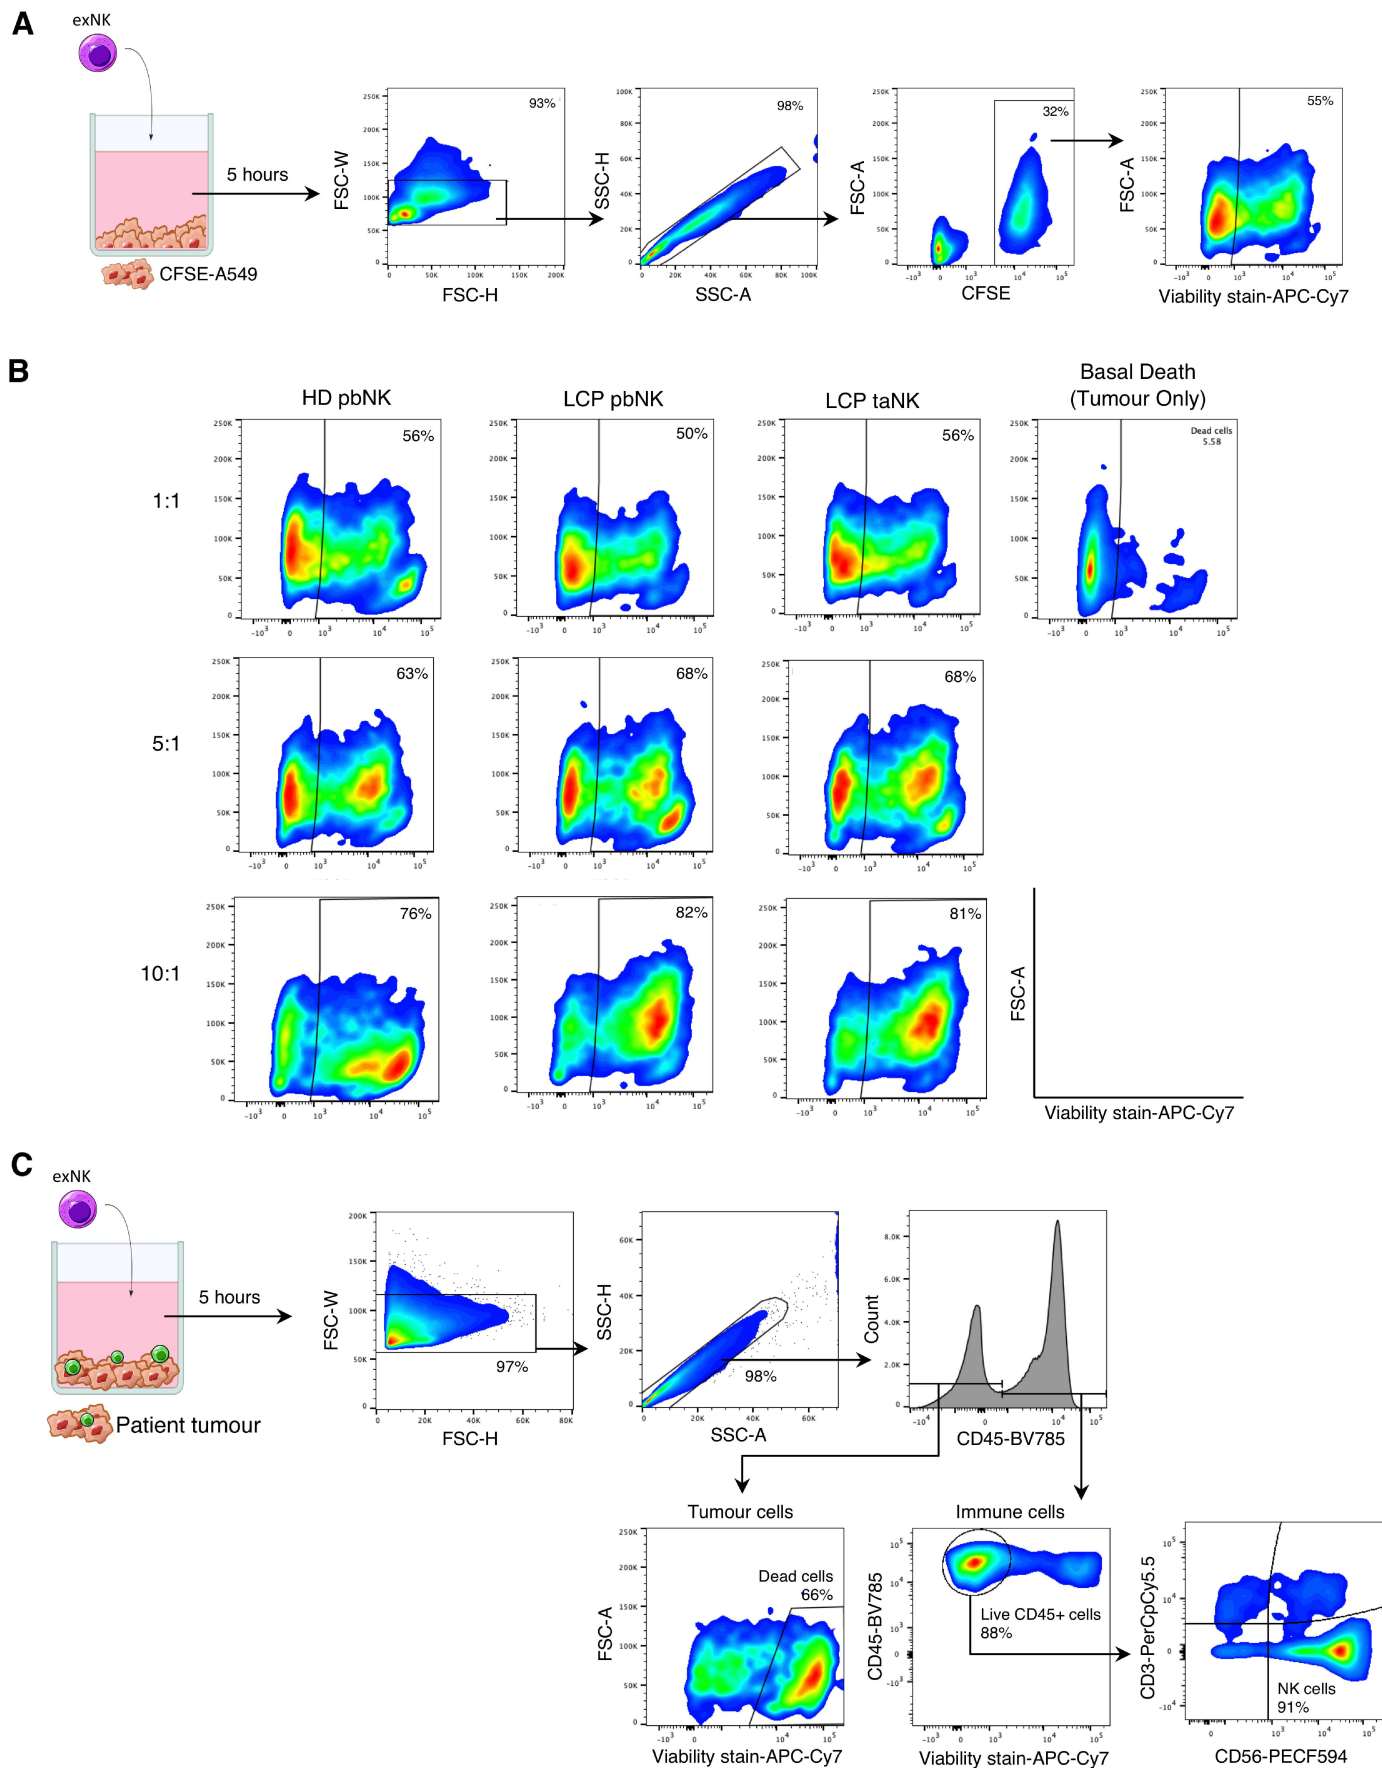

Figure S2

Supplement: jitc-2020-001933supp002.pdf [file jitc-2020-001933supp002.pdf]

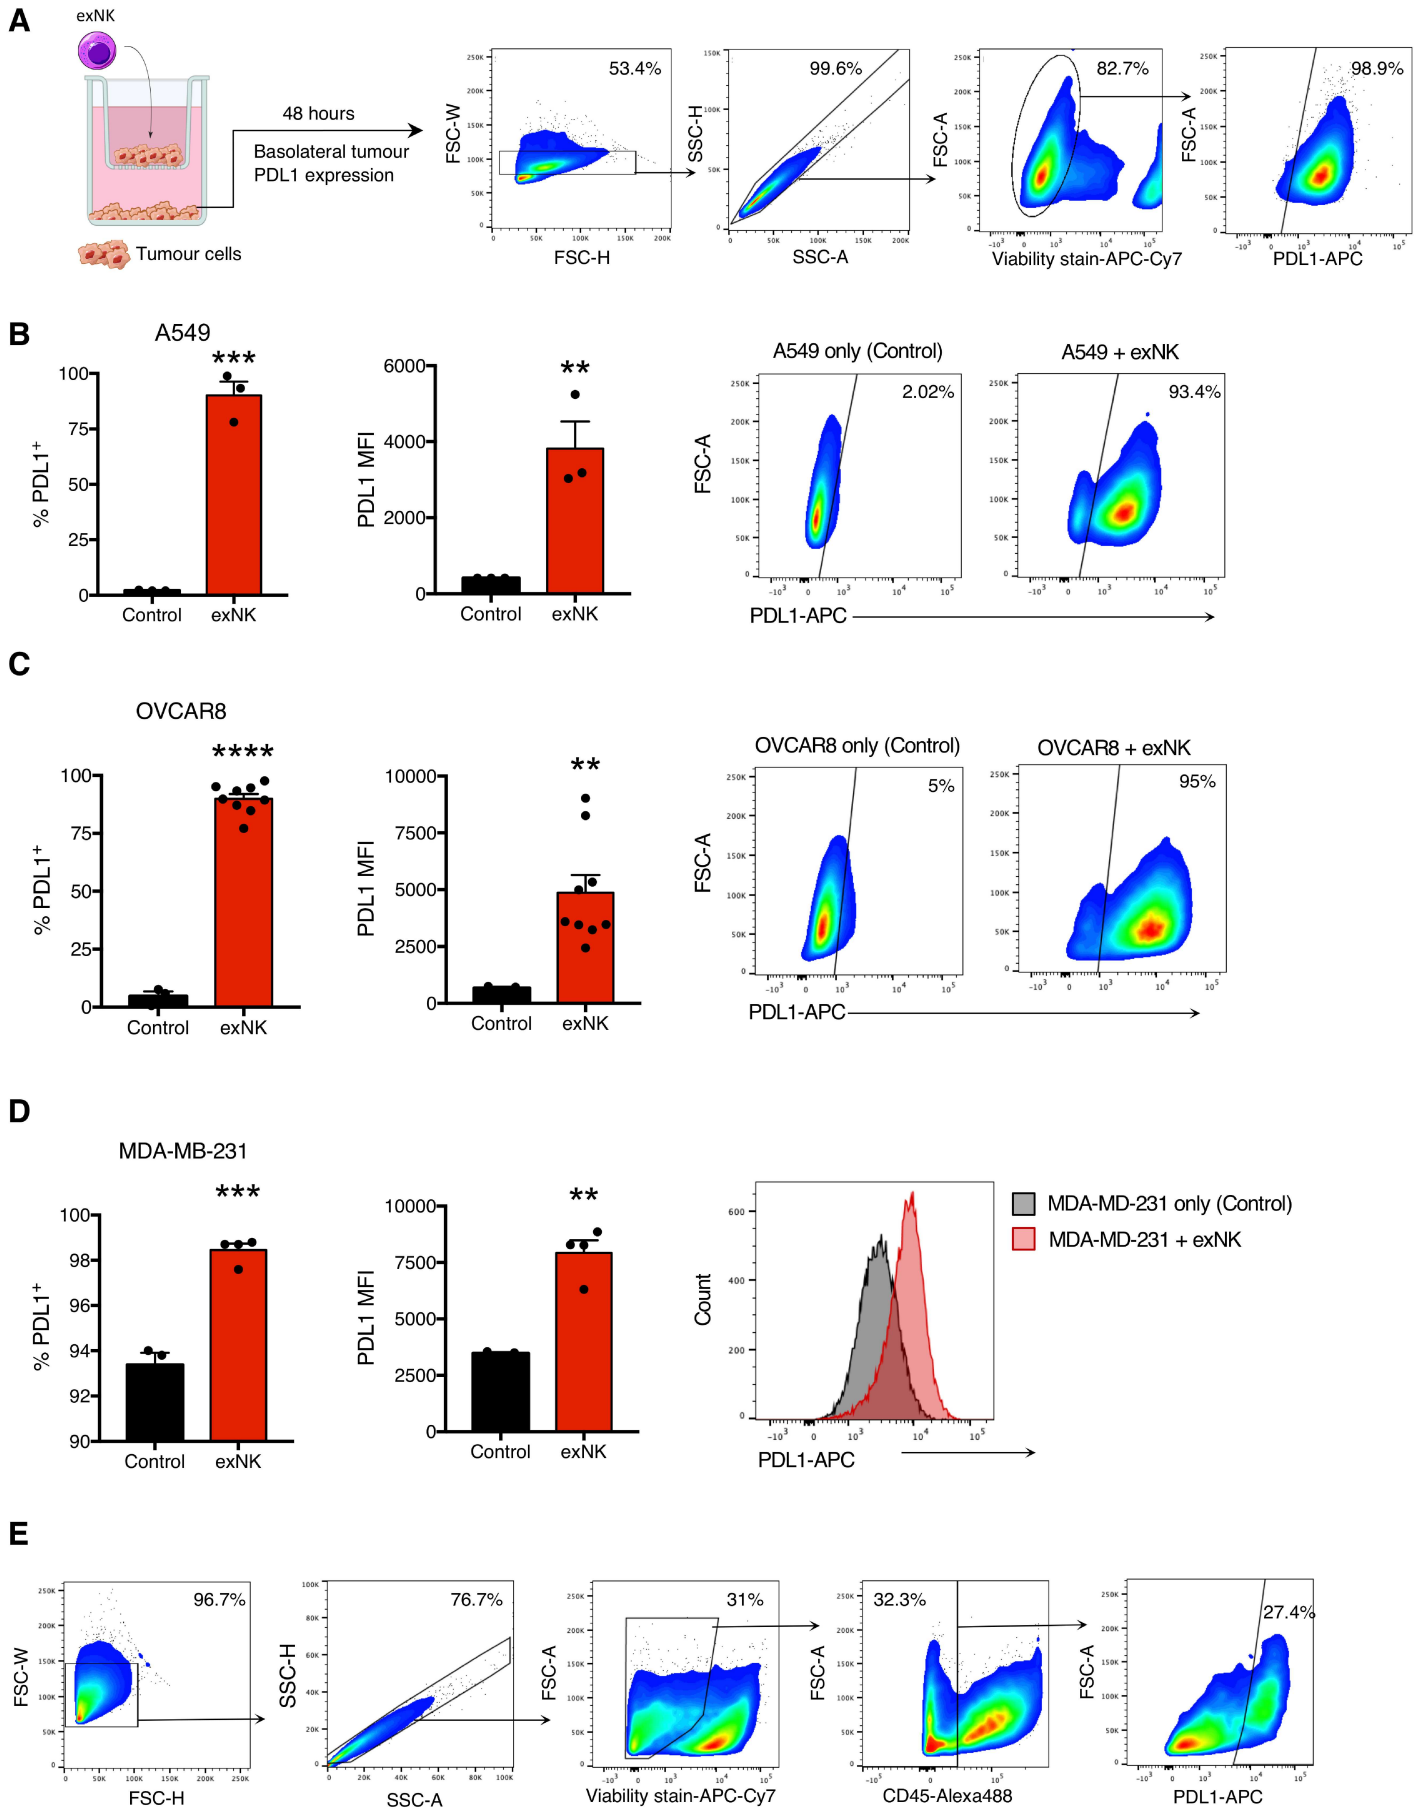

Figure S3

Supplement: jitc-2020-001933supp003.pdf [file jitc-2020-001933supp003.pdf]
